# Supplementary material for: Use of Plant Protection Products in Lombardy, Italy and the Health Risk for the Ingestion of Contaminated Water
Source: MDPI journal article supplement (doi:10.3390/toxics9070160), 2021-07-06
Supplement: s1 [file s1]

# Supplementary Materials: Use of Plant Protection Products in Lombardy, Italy and the Health Risk for the Ingestion of Contaminated Water

Rosa Mercadante, Beatrice Dezza, Teresa Mammone, Angelo Moretto and Silvia Fustinoni

Table S1. Legend of Hazard Statements.

| Code | Hazard Statements                                                 |
|------|-------------------------------------------------------------------|
| H301 | Toxic if swallowed                                                |
| H302 | Harmful if swallowed                                              |
| H303 | May be harmful if swallowed                                       |
| H311 | Toxic in contact with skin                                        |
| H312 | Harmful in contact with skin                                      |
| H314 | Causes severe skin burns and eye damage                           |
| H315 | Causes skin irritation                                            |
| H317 | May cause an allergic skin reaction                               |
| H318 | Causes serious eye damage                                         |
| H319 | Causes serious eye irritation                                     |
| H330 | Fatal if inhaled                                                  |
| H332 | Harmful if inhaled                                                |
| H351 | Suspected of causing cancer                                       |
| H373 | May cause damage to organs through prolonged or repeated exposure |
